1 Estimating densities of larval Salmonflies (*Pteronarcys californica*) through multiple pass  
2 removal of post-emergent exuvia in Colorado rivers.

3

4 Brian D. Heinold<sup>1\*</sup>, Dan A. Kowalski<sup>2\*</sup>, R. Barry Nehring<sup>2</sup>

5

6 <sup>1</sup>Colorado Parks and Wildlife, Fort Collins, Colorado, United States of America

7 <sup>2</sup> Colorado Parks and Wildlife, Montrose, Colorado, United States of America

8

9 \*Corresponding author

10 E-mail: dan.kowalski@state.co.us (DK)

11

## 12 **Abstract**

13 Traditional methods of collecting and sorting benthic macroinvertebrate samples are useful  
14 for stream biomonitoring and ecological studies; however, these methods are time consuming,  
15 expensive, and require taxonomic expertise. Estimating larval densities through collection of  
16 post-emergent exuvia can be a practical and time efficient alternative. We evaluated the use of  
17 multiple pass depletion techniques of the post-emergent exuvia of *Pteronarcys californica* to  
18 estimate larval densities at ten sites in three Colorado rivers. Exuvia density was highly  
19 correlated with both final-instar larval density ( $R^2 = 0.90$ ) and total larval density ( $R^2 = 0.88$ ) and  
20 the multiple pass removal technique performed well. Exuvia surveys found *P. californica* at  
21 three low density sites where benthic sampling failed to detect it. At moderate and high density  
22 sites the exuvia surveys always produced lower density estimates than benthic surveys. Multiple  
23 pass depletion estimates of exuvia proved to be an accurate and efficient technique at estimating

24 larval densities and provided an effective alternative for traditional benthic sampling when  
25 objectives are monitoring *P. californica* and detecting populations, especially at low density  
26 sites.

## 27 **Introduction**

28 Evaluating the condition of freshwater ecosystems through benthic macroinvertebrate  
29 communities is a common approach for stream health assessment and biomonitoring [1-3]. These  
30 methods characterize and compare aquatic invertebrate communities among sites using  
31 regionally developed standards. Benthic studies, while useful, are labor and time intensive,  
32 expensive, sensitive to sampling techniques, and require taxonomic expertise. The costs can be  
33 justified by the valuable data used by government agencies, researchers, and water managers to  
34 maintain and monitor water quality and understand function of river ecosystems. But, if  
35 sampling objectives are more specific and budgets are limited, whole community benthic  
36 sampling may not be necessary or the most appropriate technique.

37 One ecologically important aquatic invertebrate commonly used as a bioindicator is the  
38 Giant Salmonfly (*Pteronarcys californica* Newport). It is useful for biomonitoring because of its  
39 sensitivity to habitat alteration, widespread distribution in western North America [4, 5], multi-  
40 year larval life stage, large body size, easy identification, low larval dispersal, and well defined  
41 larval habitat preferences [6-9]. *Pteronarcys californica* is among the largest and longest lived  
42 stonefly in western North America [10-12]. In Colorado, larvae typically inhabit unpolluted,  
43 medium to large, permanent streams with unconsolidated cobble and large gravel substrates  
44 between 1,500 and 2,500 m in elevation [13, 14]. Adults emerge from late May to early July and  
45 recruitment begins in April after a 9-10 month egg diapause [15] followed by a three to four year  
46 aquatic larval stage [16, 17]. Mature larvae (larvae expected to hatch that year) migrate toward

47 the stream bank to stage a highly synchronous adult emergence. Salmonflies typically emerge at  
48 night crawling out of the water onto riparian substrates to become winged terrestrial adults where  
49 they leave post-emergent exuvia (hereafter, exuvia).

50 *Pteronarcys californica* plays an important ecological role, both in biomass and  
51 abundance, in stream and riparian food webs. As shredders, larvae process coarse organic matter  
52 like vascular plants and algae [9, 18] making the nutrients available to other feeding groups as  
53 detritus or body biomass [19]. Salmonflies can comprise a large portion of the benthic biomass  
54 because of their large body size and high densities in suitable habitat [20, 21], making them an  
55 important component of stream food webs for crayfish, other invertebrates, and trout [22, 21].  
56 Terrestrial adults are part of a critical link for aquatic-riparian nutrient and energy exchange [23]  
57 as prey for frogs, birds, bats, and spiders [15, 24]. Despite its ecological importance, range-wide  
58 declines of *P. californica* have been documented in the Logan and Provo Rivers in Utah [25, 26],  
59 several rivers in Montana [27], and in the Gunnison and Colorado Rivers in Colorado [4, 28]  
60 mostly due to effects of dams like decreased water quantity and quality, siltation, and pollution.

61 Density of benthic macroinvertebrates is traditionally estimated by systematically  
62 collecting samples from a fixed area of the stream bed. Alternative methods have been recently  
63 developed to indirectly survey communities by identifying and enumerating exuvia. These  
64 methods can reduce time and labor of traditional techniques while providing reliable population  
65 density estimates, community structure, and life history information. Ruse [29] deduced  
66 chironomid communities from larval and pupal exuvia and Foster and Soluk [30] estimated  
67 densities of the endangered Hine's emerald dragonfly (*Somatochlora hineana*) more accurately  
68 by sampling larval exuvia than by collecting adults. Raebel et al. [31] stated the importance of  
69 exuvia collections to avoid bias in adult Odonata surveys. DuBois [32] enhanced these studies by

70 using a depletion population estimator to approximate exuvia densities and detection  
71 probabilities of Anisoptera. Richards et al. [33] correlated *P. californica* exuvia densities and live  
72 (wet) larval body weights with substrate embeddedness to demonstrate differences in life history,  
73 distribution, and abundance above and below a main stem impoundment. Their work provided a  
74 foundation in the development of our novel technique to estimate larval densities through  
75 multiple pass removal sampling of exuvia.

76 Multiple pass removal sampling is a commonly used technique in wildlife and fisheries to  
77 estimate population size of closed populations. Assumptions of this models used to analyze these  
78 data are closure (no deaths, births, emigration, or immigration) and constant capture probability  
79 [34, 35] that must be met to avoid bias [36, 37]. If more than two depletion events are completed  
80 then assumptions about capture probabilities can be relaxed and capture rates for different passes  
81 can be estimated. If populations can be considered geographically and demographically closed  
82 (due to isolation or short sampling time period) then population estimation can be accomplished  
83 rather simply if good unbiased estimates of detection probability are possible.

84 The objective of this study was to couple traditional benthic invertebrate sampling with  
85 multiple pass removal techniques to evaluate if closed population estimation models can be used  
86 to estimate the density *P. californica* larvae. We tested this by correlating densities of  
87 systematically collected exuvia from the riparian area with densities of larvae from benthic  
88 samples. Another goal was to provide a safer and more efficient method for estimating single  
89 species densities.

## 90 **Methods**

### 91 **Study area**

92 Benthic and exuvia sampling was conducted at ten sites on three rivers in Colorado. Eight  
93 sites were sampled on the Colorado River and one on the Fraser River both in north central  
94 Colorado, and one site on the Gunnison River in southwest Colorado (Fig 1). Distance between  
95 the lowest Colorado River site and the Fraser River sites is 74 km.

**Fig 1. *Pteronarcys californica* benthic and exuvial collection sites in 2010 from the Colorado and Fraser Rivers. Gunnison River site shown only on inset map.**

## 96 Benthic sampling

97 Three benthic subsamples were taken at each site between 15 -18 April 2010 from the  
98 Colorado and Fraser Rivers and 10 May 2010 from the Gunnison River, approximately 1 month  
99 prior to the typical adult emergence times of *P. californica*. All sites were located in riffle areas  
100 dominated by cobble substrates interspersed with gravel except for sites 7 and 8 which were  
101 dominated by sand and gravel. A modified Surber sampler with a 0.25 m<sup>2</sup> sampling frame (55.0  
102 cm x 45.5 cm) and 150 µm mesh net was used. Cobbles larger than 10 cm in diameter were  
103 individually scrubbed with a brush, invertebrates washed into the net, and then the cobbles  
104 removed from the sampling frame. Remaining substrate within the frame was disturbed to a  
105 depth of 10 cm to dislodge invertebrates into the net. Contents were preserved with 80% ethanol  
106 in 2 L plastic jars.

107 In the lab, all *P. californica* larvae were sorted, sexed [21, 38], and measured for total  
108 length (TL) from the anterior tip of head to the posterior tip of the epiproct to the nearest  
109 millimeter under a dissecting microscope with a calibrated ocular micrometer. Length frequency  
110 histograms for male and female larvae were constructed based on TL to separate annual year  
111 classes. Densities of mature larvae and densities of all larvae were calculated and used in  
112 separate analyses for correlation with exuvia densities. Mature larval cut off lengths were distinct

113 from the younger year class providing reliable data for analysis despite problems with TL  
114 measurements. Separating cohorts and year classes of merovoltine species has proven difficult  
115 because of varying growth rates [16] and contraction or expansion of abdomens in preserved  
116 insect specimens can further confound this task. Our colleagues [39] used head capsule width  
117 and combined head and thorax lengths to produce “body size” or “body area” to assign cohorts  
118 within a stream.

## 119 **Exuvia sampling**

120         Sampling began with the onset of *P. californica* adult emergence on the Colorado River  
121 at site nine on 2 June 2010 and proceeded upstream to end at site one on the Fraser River on 21  
122 June 2010; sampling at site 10 on the Gunnison River lasted from 16-23 June 2010. Each site  
123 was sampled beginning on the day when the first exuvia was found or winged adults were  
124 observed and continued daily until exuvia were no longer found. Data collection was performed  
125 by searching for exuvia within 10 m of the bank along two 30.5 m transects on one side of the  
126 river directly adjacent to benthic sampling sites. Collections at a site were accomplished by 2-4  
127 people in a matter of 2-6 hours completing 2-4 passes with identical effort and personnel.  
128 Specimens were taken only when attached to dry riparian and emergent substrates; none were  
129 taken from the water to avoid counting ones that possibly drifted into the site. Exuvia were  
130 enumerated on hand held counters, stored in sealable bags, and removed from the search area.  
131 Amount of time searching varied by site depending on the number of exuvia and complexity of  
132 riparian search area.

## 133 **Data analysis**

134         Area of benthic habitat was estimated by multiplying the sampling section length (always  
135 30.5 m) by the average wetted channel width derived from 10 evenly spaced cross-channel

136 transects. To evaluate the assumptions of the removal model and appropriateness of this  
137 sampling technique, three and four pass removal data were compared to two pass data for twenty  
138 of the sampling events. Three and four pass data were analyzed with the Huggins Closed Capture  
139 model in Program Mark [40, 41] and two pass data were analyzed with the simpler two pass  
140 removal model [34]. In Mark, models were built that varied capture probability by pass, allowing  
141 a different capture probability for the first pass and the second pass and the third pass or third  
142 and fourth passes. Declining capture probability with subsequent passes is a common source of  
143 bias of removal models in fisheries data [36, 37] and comparing the population estimates and  
144 capture probabilities allowed us to evaluate the assumption of constant capture probability of the  
145 simpler two pass model. The assumptions of demographic and geographic closure were expected  
146 to be met due to immobility of exuvia and the emergence occurring at night. To evaluate if  
147 exuvia densities accurately estimated larval densities, we used simple linear regression in R [42].  
148 Exuvia densities were the dependent variable and densities of mature larvae and all age class  
149 larvae were both used in separate analyses as the independent variable.

## 150 **Results**

151       Adult emergence of *P. californica* lasted between 2-8 days at each site and proceeded  
152 upstream approximately 4 km per day. Early in the emergence, male exuvia were dominant and  
153 sex ratios were more even toward the end of the emergence. Approximately 97% of exuvia  
154 (n=21,526) were collected within 2 m of the bank. A total of 592 larvae were collected. Larvae  
155 from the Colorado and Fraser Rivers separated into four year classes; mature female larvae were  
156  $\geq 39$  mm TL (mean 46.5, SE 0.51) and males  $\geq 35$  mm TL (mean 39.2, SE 0.34) (Table 1).  
157 Larvae from the Gunnison River separated into three year classes; mature female larvae  $\geq 41$  mm

158 TL (mean 49.1, SE 0.51) and mature males  $\geq 37$  mm TL (mean 41.9, SE 0.46) (Table 2). Mature  
 159 females were significantly larger than mature males within each river ( $p=0.0000$  for each).

**Table 1. Year class lengths and frequency distribution of *Pteronarcys californica* larvae collected 30 April- 1 May 2010 from the Colorado and Fraser Rivers.**

Lengths in mm from anterior tip of head to posterior tip of epiproct.

| Year Class | Male larvae (n=149) | Female larvae (n=123) |
|------------|---------------------|-----------------------|
| 1          | $\leq 15$ mm (33)   | $\leq 17$ mm (41)     |
| 2          | 16-25 (34)          | 18-25 (25)            |
| 3          | 26-34 (31)          | 26-38 (29)            |
| 4          | $\geq 35$ (51)      | $\geq 39$ (28)        |

**Table 2. Year class lengths and frequency distribution of *Pteronarcys californica* larvae collected 14 April 2010 from the Gunnison River.**

Lengths in mm from anterior tip of head to posterior tip of epiproct.

| Year Class | Male larvae (n=191) | Female larvae (n=129) |
|------------|---------------------|-----------------------|
| 1          | $\leq 23$ mm (162)  | $\leq 23$ mm (95)     |
| 2          | 24-36 (14)          | 24-40 (12)            |
| 3          | $\geq 37$ (15)      | $\geq 41$ (22)        |

160

161 Exuvia densities were highly correlated with both mature larval densities ( $R^2 = 0.90$ ) and  
 162 total larval densities ( $R^2 = 0.88$ ). Exuvia densities averaged 2.6/m<sup>2</sup> and ranged from 0.002/m<sup>2</sup> to  
 163 11.443/m<sup>2</sup> (Table 3). Total larval density averaged 80.0/m<sup>2</sup> and ranged from 0 to 437.3/m<sup>2</sup>.  
 164 Density of mature larvae averaged 16.1/m<sup>2</sup> and varied from 0 to 101.3/m<sup>2</sup>. The correlation  
 165 between mature larvae and exuvia densities was high but the relationship was not 1:1. Larval  
 166 estimates were generally higher than exuvia estimates except at sites 2, 3, and 7 where exuvia  
 167 were found but no larvae. To predict the density of mature larvae, the linear equation was: larval  
 168 density = 7.358\*(exuvia density) - 2.854.

**Table 3. Densities in m<sup>2</sup> of *Pteronarcys californica* pre-emergent larvae, all larvae, exuvia, and population estimates from exuvia collected from April-June 2010 from the Colorado, Fraser, and Gunnison Rivers.**

| Site | Densities m <sup>2</sup> |                     |        |                            |
|------|--------------------------|---------------------|--------|----------------------------|
|      | All larvae               | Pre-emergent larvae | Exuvia | Exuvia population estimate |
| 1    | 8.00                     | 1.33                | 0.854  | 0.872                      |
| 2    | 0.00                     | 0.00                | 0.064  | 0.065                      |
| 3    | 0.00                     | 0.00                | 0.077  | 0.079                      |
| 4    | 4.00                     | 4.00                | 2.391  | 2.477                      |
| 5    | 4.00                     | 1.33                | 0.686  | 0.697                      |
| 6    | 44.00                    | 4.00                | 0.306  | 0.315                      |



|    |        |        |        |        |
|----|--------|--------|--------|--------|
| 7  | 0.00   | 0.00   | 0.002  | 0.002  |
| 8  | 5.33   | 0.00   | 0.007  | 0.007  |
| 9  | 297.33 | 101.33 | 11.001 | 11.443 |
| 10 | 437.33 | 49.33  | 9.392  | 9.849  |

169

170 Exuvia detected populations at all 10 sites whereas larvae were found at only seven of the  
171 10 sites (Table 3). Capture probabilities of exuvia ranged from 0.45 to 0.89 (average 0.72).  
172 Simple two pass population models were sufficient to produce unbiased population estimates.  
173 Capture probabilities and population estimates were very similar for both the Huggins closed  
174 capture model for three and four pass estimates and the Zippin two pass estimates (Fig 2). The  
175 two pass depletion technique worked best at sites with moderate exuvia densities and there was  
176 some variation in capture probability at very low densities (<80 exuvia per 30.5 m) and very high  
177 densities (> 6,000 exuvia per 30.5 m) indicating that the assumption of equal capture  
178 probabilities for all passes is violated with the simple two pass model. However, that bias was  
179 small and population estimates of the two models were very close (Fig 2).

**Fig 2. Population estimates ( $N$ ) and capture probabilities ( $\hat{p}$ ) of a three pass Huggins Closed Capture model in Program Mark (with time effects that varied capture probabilities) and a simple two pass removal model of Zippin 1956.**

## 180 Discussion

181 Multiple pass removal estimates of *P. californica* exuvia effectively predicted densities of  
182 mature larvae. Assumptions of the multiple pass depletion models appeared to be met and  
183 capture probability varied minimally among passes. The two-pass depletion technique performed  
184 well due to immobility of exuvia, high capture probability, and no size selective gear [36, 37,  
185 43], suggesting two sampling passes can be adequate if three or four passes are cost prohibitive  
186 as with Odonata exuvia [32].

187 Correlation between densities of exuvia and mature larvae were high but not 1:1. Exuvia  
188 underestimated larvae at high density sites but at low density sites exuvia overestimated larvae.  
189 The underestimation of larval densities is likely attributed to the behavior of mature larvae  
190 congregating near the river bank prior to emergence in the shallow, wadeable water where  
191 benthic sampling must occur, creating an artifact of unnaturally high densities. Other factors that  
192 may contribute to an underestimate are imperfect detection probability of exuvia and dispersal of  
193 larvae out of the sampling area or predation in the 1-2 month time period between benthic  
194 sampling and emergence. Overestimates were likely due to the high capture probability of exuvia  
195 in addition to the difficulty of collecting larvae that are rare at a site using Hess or Surber  
196 samplers [44]. Therefore, exuvia sampling may more accurately estimate, not necessarily  
197 overestimate, larval densities than benthic sampling at low density sites.

198 Detection rates of populations through exuvia sampling were higher than for benthic  
199 sampling. This is likely because the large amount of available benthic habitat was essentially  
200 reduced to a much smaller, well defined and more easily accessible riparian sampling area.  
201 Riparian sampling area among sites averaged 61 m<sup>2</sup> (30.5 m long x 2 m wide) compared to 742  
202 m<sup>2</sup> (400-1500 m<sup>2</sup>) of unevenly distributed benthic habitat, much of which may not be accessible  
203 by wading due to excessive depth or water velocities  $\geq 2$  m/s.

204 Presence of exuvia or adults is the only evidence of successful life cycle completion.  
205 Varying densities can indicate habitat quality and help identify reference sites and priority areas  
206 for river conservation, restoration, and monitoring of *P. californica*. In regions where *P.*  
207 *californica* does not occur, this technique may be useful for other easily recognizable stoneflies  
208 like *Pteronarcella badia*, *Claassenia sabulosa*, *Hesperoperla pacifica*, or mayflies like  
209 *Timpanoga hecuba*. This technique eliminated the need for benthic sample collection,

210 preservation, and subsequent expense of processing in the laboratory. It also provided accurate  
211 and less biased density estimates of *P. californica* larvae than those derived from benthic  
212 samples.

213 Benthic sampling of aquatic invertebrates is a useful and productive biomonitoring  
214 technique but the overall process to acquire data can be labor and cost intensive. In addition, it  
215 can be difficult to find target species that are rare at a site with benthic sampling [44]. Using  
216 multiple pass removal sampling of the recently shed exuvia can be an effective and efficient way  
217 to estimate densities of *P. californica* and may be superior to traditional benthic sampling at  
218 detecting the species at very low densities.

## 219 **Acknowledgements**

220 We would like to thank Justin Pomeranz, Jon Ewert, technicians, and volunteers for tireless field  
221 work counting exuvia. Dr. Boris Kondratieff kindly provided valuable lab space and equipment.

## 222 **References**

- 223 1. Goodnight CJ. The use of aquatic macroinvertebrates as indicators of stream pollution.  
224 Transactions of the American Microscopical Society. 1973; 92: 1-13.
- 225 2. Rosenberg DM, Resh VH. Introduction to freshwater biomonitoring and benthic  
226 macroinvertebrates. Chapman and Hall, New York. 1993.
- 227 3. Barbour MT, Gerritsen J, Snyder BD, Stribling JB. Rapid bioassessment protocols for use in  
228 streams and wadeable rivers: periphyton, benthic macroinvertebrates and fish. 2nd edition.  
229 U.S. Environmental Protection Agency; Office of Water; Washington, D.C. 1999
- 230 4. Elder JA, Gaufin AR. Notes on the occurrence and distribution of *Pteronarcys californica*  
231 Newport (Plecoptera) within streams. Great Basin Naturalist. 1973; 33: 218–220.

- 232 5. Surdick RF, Gaufin AR. Environmental requirements and pollution tolerance of Plecoptera.  
233 Environmental Protection Agency, Environmental Monitoring and Support Laboratory,  
234 Cincinnati, Ohio. 1978.
- 235 6. Kauwe JSK, Shiozawa DK, Evans RP. Phylogeographic and nested-clade analysis of the  
236 stonefly *Pteronarcys californica* (Plecoptera: Pteronarcyidae) in the Western USA. Journal  
237 of the North American Benthological Society. 2004; 23: 824–838.
- 238 7. Myers LW, Kondratieff BC. Larvae of North American species of *Pteronarcys* (Plecoptera:  
239 Pteronarcyidae). Illiesia. 2017, 13:192-224. doi.org/10.25031/2017/13.16
- 240 8. Fore LS, Karr JR, Wisseman RW. Assessing invertebrate responses to human activities:  
241 Evaluating alternative approaches. Journal of the North American Benthological Society.  
242 1996; 15: 212-231.
- 243 9. Freilich JE. Movement patterns and ecology of *Pteronarcys* nymphs (Plecoptera):  
244 observations of marked individuals in a Rocky Mountain stream. Freshwater Biology. 1991;  
245 25: 379–394.
- 246 10. Needham JG, Claassen PW. A Monograph of the Plecoptera of North America North of  
247 Mexico. Entomological Society of America, Lafayette, Indiana. 1925.
- 248 11. Smith L. Studies of North American Plecoptera (Pteronarcinae and Perlodini). Transactions  
249 of the American Entomological Society. 1917; 43: 433-489. Available from:  
250 <http://www.jstor.org/stable/25076980>
- 251 12. Gaufin AR, Ricker ER, Miner M, Milam P, Hays RA. The stoneflies (Plecoptera) of  
252 Montana. Transactions of the American Entomological Society. 1972; 98: 1–161.
- 253 13. Brusven MA, Prather KV. Influence of stream sediment on distribution of macrobenthos.  
254 Journal of the Entomological Society of British Columbia. 1974; 71: 25-32.

- 255 14. Heinold BD. The mayflies (Ephemeroptera), stoneflies (Plecoptera), and caddisflies  
256 (Trichoptera) of the South Platte River Basin of Colorado, Nebraska, and Wyoming. M. Sc.  
257 Thesis, Colorado State University. 2010. doi: 10.13140/RG.2.2.24657.17761
- 258 15. DeWalt RE, Stewart KW. Life histories of stoneflies (Plecoptera) in the Rio Conejos of  
259 southern Colorado. *Great Basin Naturalist*. 1995; 55: 1–18.
- 260 16. Townsend GD, Pritchard G. Larval growth and development of the stonefly *Pteronarcys*  
261 *californica* (Insecta: Plecoptera) in the Crowsnest River, Alberta. *Canadian Journal of*  
262 *Zoology*. 1998; 76: 2274–2280.
- 263 17. Sheldon AL. Emergence patterns of large stoneflies (Plecoptera: Pteronarcys, Calineuria,  
264 Hesperoperla) in a Montana river. *Great Basin Naturalist*. 1999; 59: 169-174.
- 265 18. Fuller RL, Stewart KW. Stonefly (Plecoptera) food habits and prey preference in the Dolores  
266 River, Colorado. *American Midland Naturalist*. 1979; 101: 170-181.
- 267 19. Short RA, Maslin PE. Processing of leaf litter by a stream detritivore: Effect on nutrient  
268 availability to collectors. *Ecology*. 1977; 58: 935-938.
- 269 20. Erickson RC. Benthic field studies for the Windy Gap study reach, Colorado River,  
270 Colorado, fall 1980 to fall 1981. Prepared for The Northern Colorado Water Conservancy  
271 District, Municipal Sub-District. 1983.
- 272 21. Nehring RB. Stream fisheries investigations. Colorado Division of Wildlife, Federal Aid in  
273 Sportfish Restoration, Project F-51-R, Progress Report, Fort Collins. 1987.
- 274 22. Needham JG, Christenson RO. Economic insects in some streams of northern Utah. Logan,  
275 UT: Utah Agricultural Experiment Station Bulletin. 1927; 201: 1- 36.

- 276 23. Baxter CV, Fausch KD, Saunders WC. Tangled webs: reciprocal flows of invertebrate prey  
277 link streams and riparian zones. *Freshwater Biology*. 2005; 50: 201-220.  
278 <https://doi.org/10.1111/j.1365-2427.2004.01328.x>
- 279 24. Muttkowski RA. The food of trout in Yellowstone National Park. *Roosevelt Wild Life*  
280 *Bulletin*. 1925; 2: 470–497.
- 281 25. Vinson M. A short history of *Pteronarcys californica* and *Pteronarcella badia* in the Logan  
282 River, Cache County, Utah. Utah State Bug Lab. Pteronarcyidae History Ongoing blog. Last  
283 updated 14 January 2008. Available from:  
284 <https://www.usu.edu/buglab/Content/Files/salmonfly%20history.pdf>
- 285 26. Birrell J, Nelson CR. Loss of the Giant Salmonfly *Pteronarcys californica* and changes in  
286 stonefly diversity in the Provo River, Utah (Plecoptera). *Journal of Undergraduate Research*,  
287 Brigham Young University. 2018. Available from: <http://jur.byu.edu/?p=23170>
- 288 27. Stagliano DM. Evaluation of salmonflies in Montana's rivers: are statewide populations  
289 really declining? Montana Natural Heritage Program, Helena. 2010. 29 pp.
- 290 28. Nehring RB, Heinold BD, Pomeranz JF. Colorado River aquatic resources investigations.  
291 Colorado Division of Wildlife, Federal Aid Project F-237R-18, Final Report, Fort Collins.  
292 2011. Available from:  
293 [https://www.academia.edu/26701834/Colorado\\_River\\_Invertebrate\\_Investigations?auto=do](https://www.academia.edu/26701834/Colorado_River_Invertebrate_Investigations?auto=download)  
294 [wnload](https://www.academia.edu/26701834/Colorado_River_Invertebrate_Investigations?auto=download)
- 295 29. Ruse LP. Chironomid community structure deduced from larvae and pupal exuvia of a chalk  
296 stream. *Hydrobiologia*. 1995; 315: 135–142.

- 297 30. Foster SE, Soluk DA. Evaluating exuvia collection as a management tool for the federally  
298 endangered Hine's emerald dragonfly, *Somatochlora hineana* Williamson (Odonata:  
299 Cordulidae). *Biological Conservation*. 2004; 118: 15-20.
- 300 31. Raebel EM, Merckx T, Riordan P, Macdonald DW, Thompson DJ. The dragonfly delusion:  
301 why it is essential to sample exuvia to avoid biased surveys. *Journal of Insect Conservation*.  
302 2010; 14: 523–533.
- 303 32. DuBois RB. Detection probabilities and sampling rates for Anisoptera exuvia along river  
304 banks: influences of bank vegetation type, prior precipitation, and exuvia size. *International*  
305 *Journal of Odonatology*. 2015; 18: 205-215.
- 306 33. Richards DC, Rolston MG, Dunkel FV. A comparison of salmonfly density upstream and  
307 downstream of Ennis Reservoir. *Intermountain Journal of Sciences*. 2000; 6: 1-9.
- 308 34. Zippin C. The removal method of population estimation. *Journal of Wildlife Management*  
309 1958; 22: 82-90.
- 310 35. Cooch E, White G. Program MARK: A Gentle Introduction. 17th edition. 2017. Available  
311 from: <http://www.phidot.org/software/mark/docs/book/>
- 312 36. Peterson JT, Thurow RF, Guzevich JW. An evaluation of multipass electrofishing for  
313 estimating the abundance of stream-dwelling salmonids. *Transactions of the American*  
314 *Fisheries Society*. 2004; 133: 462-475.
- 315 37. Riley SC, Fausch KD. Underestimation of trout population size by maximum likelihood  
316 removal estimates in small streams. *North American Journal of Fisheries Management*. 1992;  
317 12: 768–776.

- 318 38. Branham JM, Hathaway RR. Sexual differences in the growth of *Pteronarcys californica*  
319 Newport and *Pteronarcella badia* (Hagen) (Plecoptera). *Canadian Journal of Zoology*. 1975;  
320 53: 501-506.
- 321 39. Schultheis AS, Bootha JY, Vinson MR, Miller MP. Genetic evidence for cohort splitting in  
322 the merovoltine stonefly *Pteronarcys californica* (Newport) in Blacksmith Fork, Utah.  
323 *Aquatic Insects*. 2008; 187-195.
- 324 40. Huggins RM. On the statistical analysis of capture-recapture experiments. *Biometrika*. 1989;  
325 76:133–140.
- 326 41. White GC, Burnham KP. Program MARK: survival estimation from populations of marked  
327 animals. *Bird Study*. 1999; 46:sup1: S120-S139.
- 328 42. R Development Core Team. R: A language and environment for statistical computing. 2012.  
329 R Foundation for Statistical Computing, Vienna, Austria. URL <http://www.R-project.org/>.
- 330 43. Saunders WC, Fausch KD, White GC. Accurate estimation of salmonid abundance in small  
331 streams using nighttime removal electrofishing: an evaluation using marked fish. *North*  
332 *American Journal of Fisheries Management*. 2011; 31: 403-415.
- 333 44. Vinson MR, Hawkins CP. Effects of sampling area and subsampling procedure on  
334 comparisons of taxa richness among streams. *Journal of the North American Benthological*  
335 *Society*. 1996; 15: 392-399.



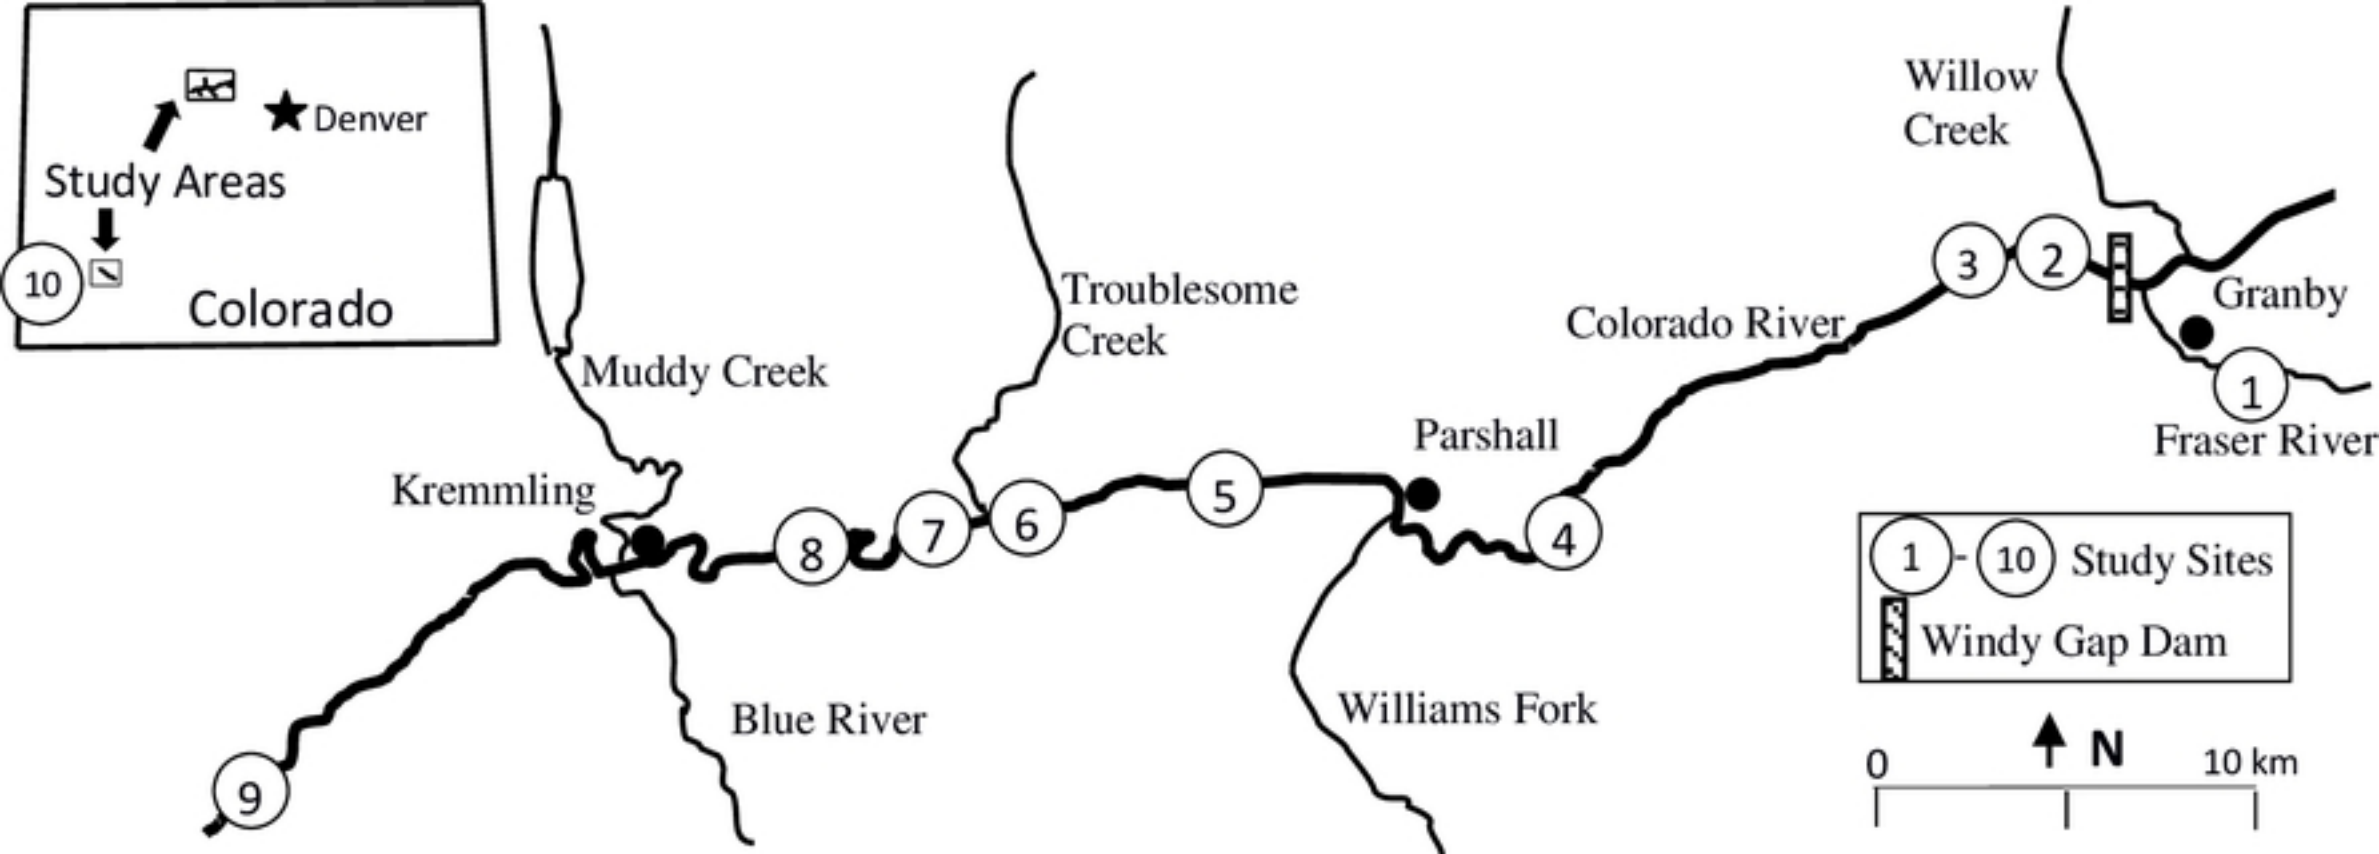

| Site | River    | Location                       | N DecDeg, -W DecDeg |
|------|----------|--------------------------------|---------------------|
| 1    | Fraser   | Kaibab Park in Granby          | 40.0810, -105.9330  |
| 2    | Colorado | 1.2 km W of Windy Gap Dam      | 40.1087, -106.0020  |
| 3    | Colorado | 2.8 km W of Windy Gap Dam      | 40.1064, -106.0150  |
| 4    | Colorado | below Byers Canyon             | 40.0520, -106.1320  |
| 5    | Colorado | 4.8 km W of Parshall           | 40.0654, -106.2330  |
| 6    | Colorado | CR 39 bridge                   | 40.0544, -106.2900  |
| 7    | Colorado | 150 m W of Troublesome Creek   | 40.0563, -106.3070  |
| 8    | Colorado | 2.4 km E of Kremmling          | 40.0494, -106.3450  |
| 9    | Colorado | Pumphouse Recreation Area      | 39.9916, -106.5040  |
| 10   | Gunnison | Ute Park in the Gunnison Gorge | 38.6786, -107.8463  |

Fig 1.tif

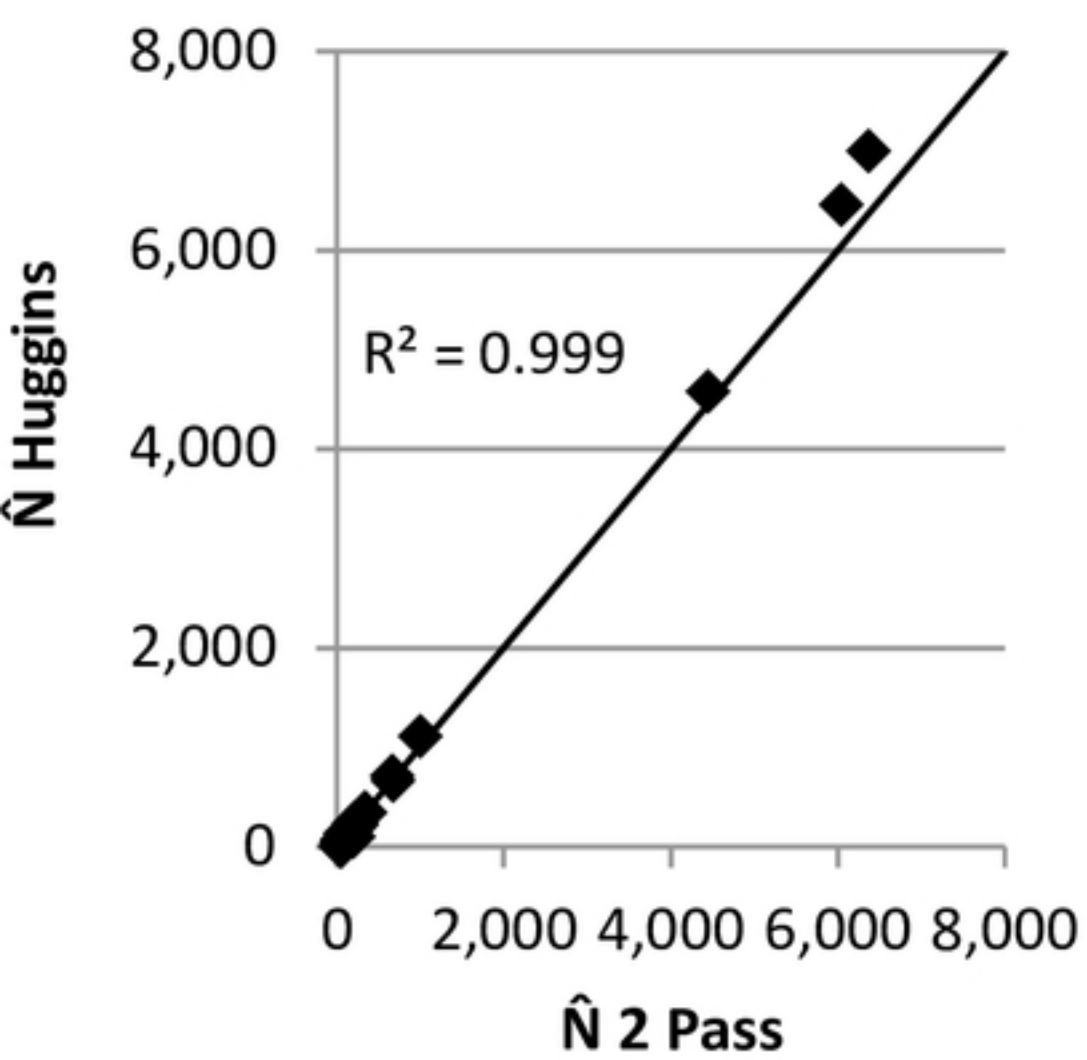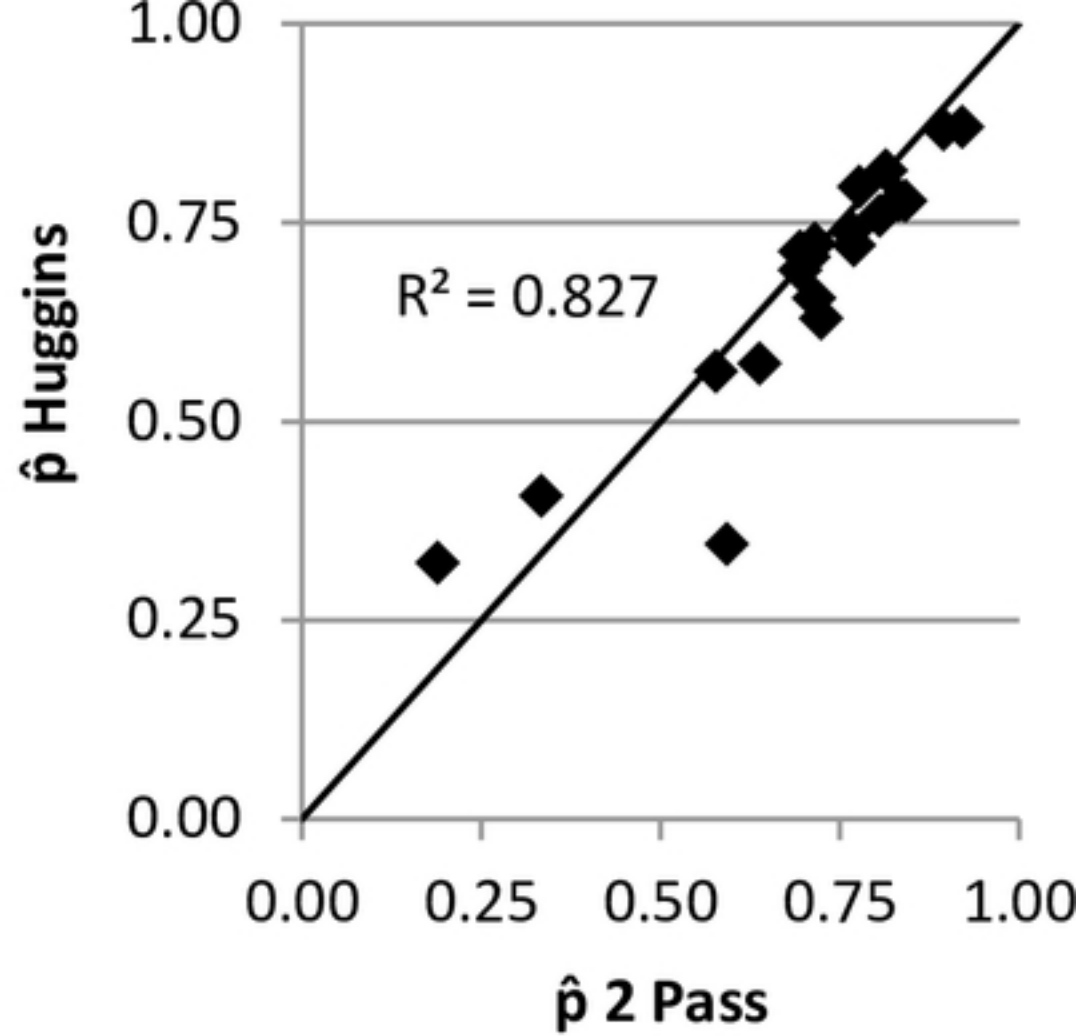

Fig 2.tif
